# Supplementary material for: A potent nonporphyrin class of photodynamic therapeutic agent: cellular localisation, cytotoxic potential and influence of hypoxia
Source: PubMed Central journal article supplement (PMC2362044; doi:10.1038/sj.bjc.6602527), 2005-04-19

**Supplemental Fig. 1:** Cellular uptake, clearance and sub-cellular localization of ADPM01 in MRC5 cells. Cellular uptake (**A**) and clearance (**B**) of ADPM01 in MRC5 cells over 6 and 24 hr periods, respectively. Each data point represents the mean fluorescent intensity/cell in 5 fields of view (minimum of 30 cells/field of view, x20 magnification). Graphs illustrate the average of three independent experiments. DAPI nuclear stain was used to count cell number/field (data not shown). Statistics for **A**, ANOVA:  $p < 0.0001$   $F=10.72$ , Bonferroni Multiple Comparison test: \*  $p < 0.01$ , compared to 15 min time point; \*\*  $p < 0.05$ , compared to 30 min time point; \*\*\*  $p < 0.05$ , compared to 1 hr time point. Statistics for **B**, ANOVA:  $p = 0.0017$ ,  $F = 5.46$ . Bonferroni Multiple Comparison test: \*  $p < 0.05$ , compared to control, i.e., immediately after removal of the drug.

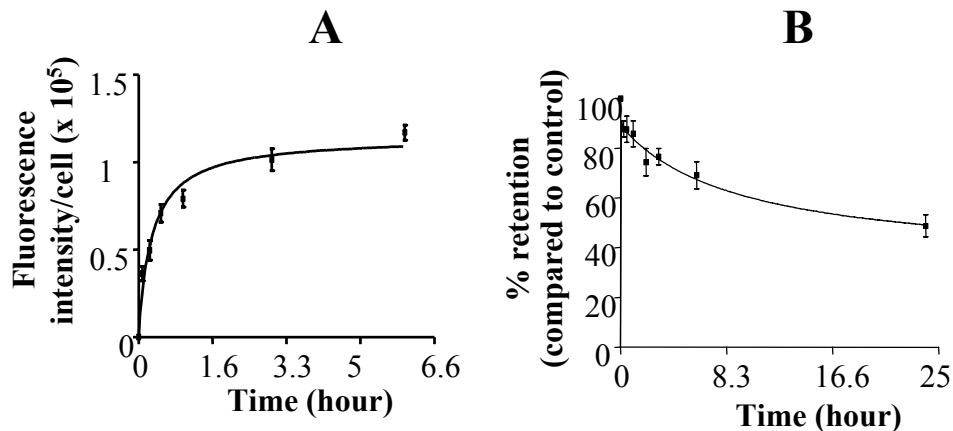

**Supplemental Fig. 2:** ADPM-mediated induction of apoptosis. Induction of apoptotic cell death in HeLa and MRC5 cells by ADPM01 and ADPM06 at EC-50 concentration level, 4 h post-irradiation. Cells were stained with PI and Annexin V and subsequently analyzed by flow cytometry. Percentages for each quadrant are shown.

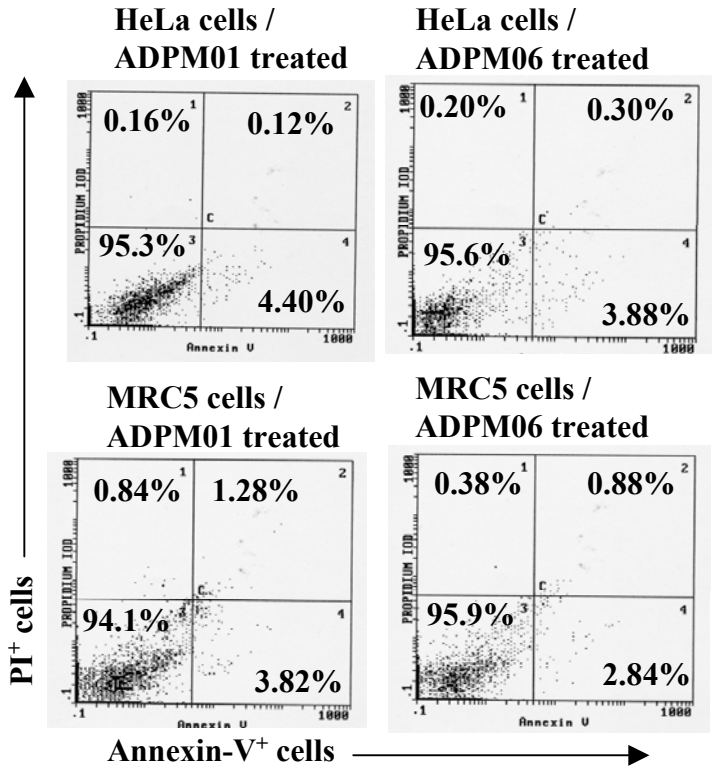

**Supplemental Fig. 3:** ADPM-mediated induction of apoptosis at 10 fold EC-50 level. Induction of apoptotic cell death in HeLa and MRC5 cells by ADPM01 and ADPM06 at 10-fold EC-50 concentration level, 16 h post-irradiation. Cells were stained with PI and Annexin V and subsequently analyzed by flow cytometry. Percentages for each quadrant are shown

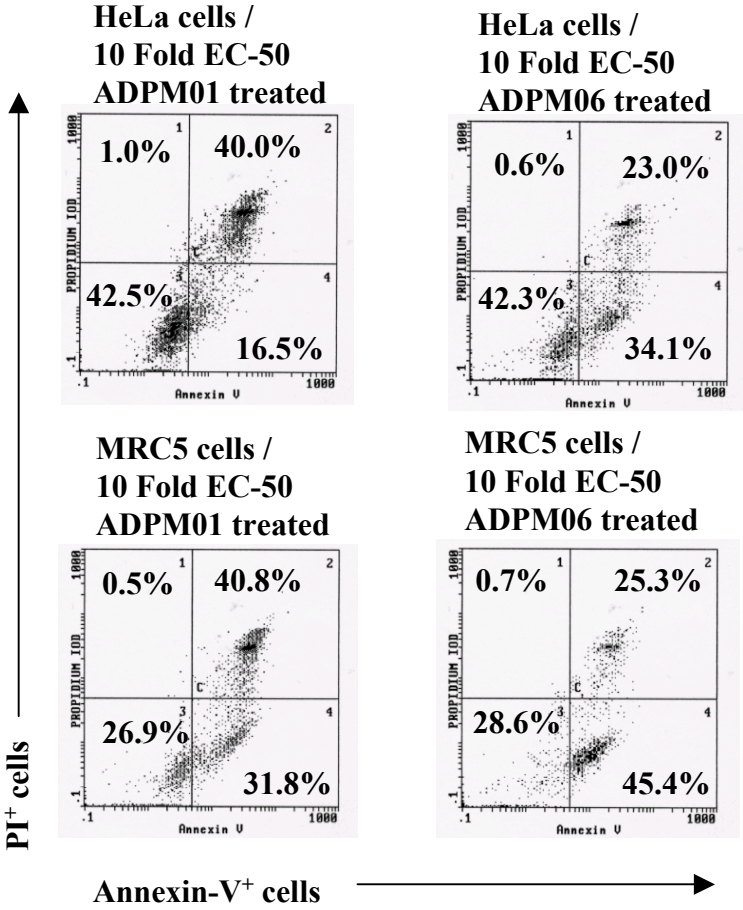

Supplement: 92-6602527x1.pdf [file 92-6602527x1.pdf]
